# Errata

Raskin P, Klaff L, McGill J, South SA, Hollander P, Khutoryansky N, Hale PM, for the Repaglinide vs. Nateglinide Metformin Combination Study Group: Efficacy and safety of combination therapy: repaglinide plus metformin versus nateglinide plus metformin. *Diabetes Care* 26:2063–2068, 2003

In Fig. 1B of the above-listed article, the solid and dashed lines were inadvertently switched. The corrected figure is shown here.

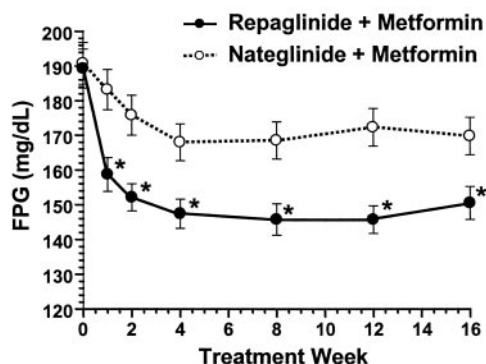

**Figure 1B**— Mean FPG values during treatment. SE values are indicated by bars. \*FPG values in the two treatment groups were significantly different ( $P < 0.05$ ).

Jacob G, Costa F, Biaggioni I: Spectrum of autonomic cardiovascular neuropathy in diabetes. *Diabetes Care* 26:2174–2180, 2003

In Table 1 of the above-listed article, the mean  $\pm$  SE upright heart rate for hyperadrenergic patients should have been given as  $103 \pm 5$  bpm.
